# Supplementary material for: Size and pH dependent photoluminescence of graphene quantum dots with low oxygen content
Source: Royal Society of Chemistry journal article supplement (doi:10.1039/c6ra21651j), 2016-01-01
Supplement: c6ra21651j1.pdf [file c6ra21651j1.pdf]

# Size and pH dependent photoluminescence of low oxidized graphene quantum dots

*Sung-Ho Song, Minho Jang, Hyewon Yoon, Yong-Hoon Cho, Seokwoo Jeon\*, Bo-Hyun Kim\**

## Contents

**Figure S1. Schematic diagram of preparative strategy of GQDs**

**Figure S2. AFM images of GQD-A and GQD-B**

**Figure S3. Raman spectra of GQD-A and GQD-B.**

**Figure S4. UV-Vis absorbances of GQD-A and GQD-B.**

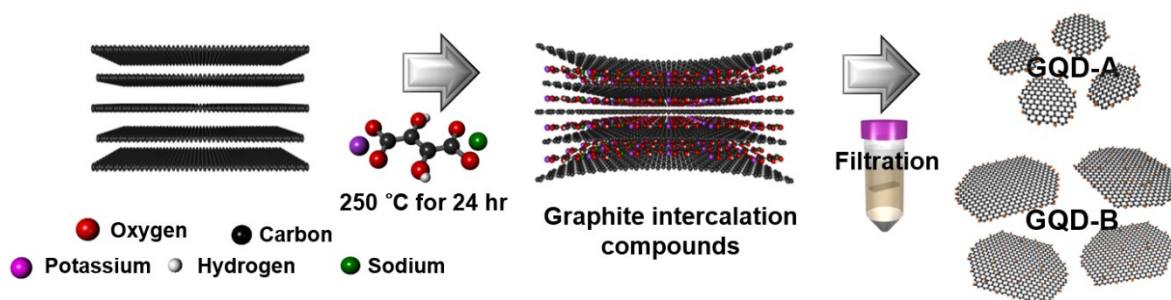

Figure S1. Schematic diagram showing the overall processes of preparative strategy of GQDs

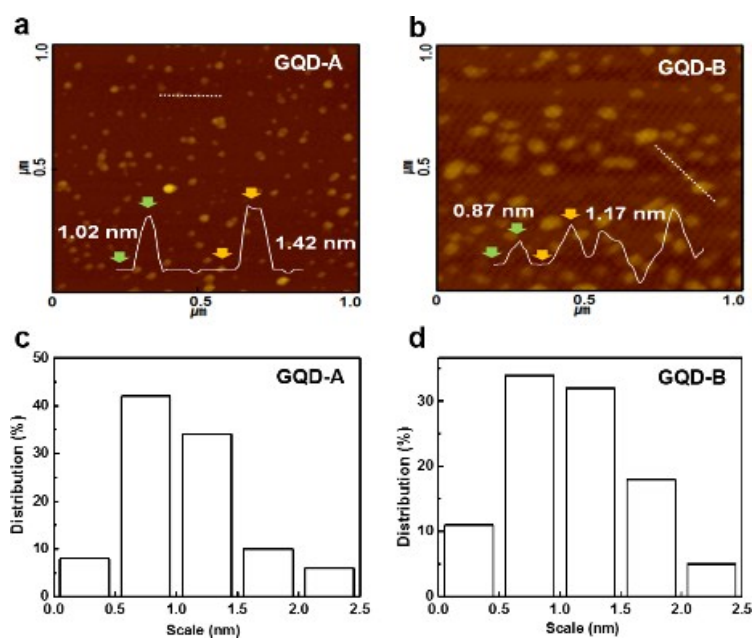

Figure S2. a and b. AFM images of GQDs with different sizes on mica substrate. c and d. The size distribution of GQDs with different sizes.

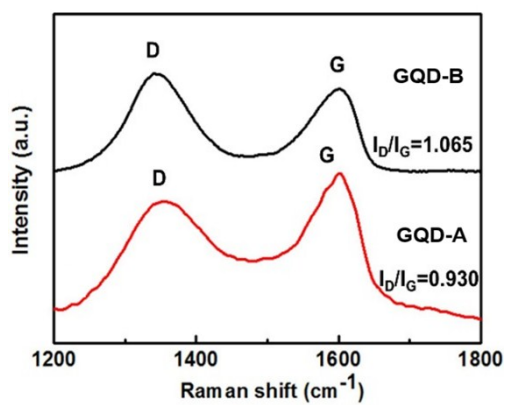

Figure S3. Raman spectra of GQD-A and GQD-B.

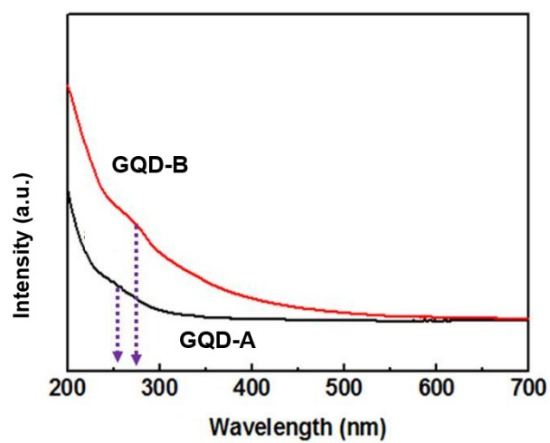

Figure S4. UV-Vis absorbances of GQD-A and GQD-B.
